# Supplementary material for: A Fruit Harvesting Mechanism Capable of Multidimensional Movements: A Preliminary Study on the Integrated Mechanism with a Hexacopter
Source: Preprints.org preprint supplement (doi:10.20944/preprints202401.1246.v1), 2024-01-16
Supplement: Supplementary file 1 [file supplementary]

Archive with 7 entries (7 files):
- Figure S1.tif
- Figure S2.tif
- Figure S3.tif
- Figure S4.tif
- Supplementary Video S1.wmv
- Supplementary Video S2.wmv
- Table S1.pdf
