# Supplementary material for: A Fruit Harvesting Mechanism Capable of Multidimensional Movements: A Preliminary Study on the Integrated Mechanism with a Hexacopter
Source: Preprints.org preprint supplement (doi:10.20944/preprints202401.1246.v1), 2024-01-16
Supplement: Supplementary file 1 [file supplementary › Table S1.pdf]

**Table S1.** PID gains applied to attitude and altitude controls when the hexacopter is (a) at null and (b) with the fruit harvesting mechanism

|          | (a) at null |      |      | (b) with fruit harvesting mechanism |    |      |
|----------|-------------|------|------|-------------------------------------|----|------|
|          | P           | I    | D    | P                                   | I  | D    |
| X        | 38          | 0.05 | 41.5 | 170                                 | 10 | 160  |
| Y        | 38          | 0.05 | 41.5 | 180                                 | 15 | 150  |
| Z        | 35          | 0    | 43   | 140                                 | 2  | 100  |
| Attitude | 81          | 0    | 20   | 130                                 | 0  | 30.2 |
