# Supplementary figures and images for: A Fruit Harvesting Mechanism Capable of Multidimensional Movements: A Preliminary Study on the Integrated Mechanism with a Hexacopter
Source: Preprints.org preprint supplement (doi:10.20944/preprints202401.1246.v1), 2024-01-16

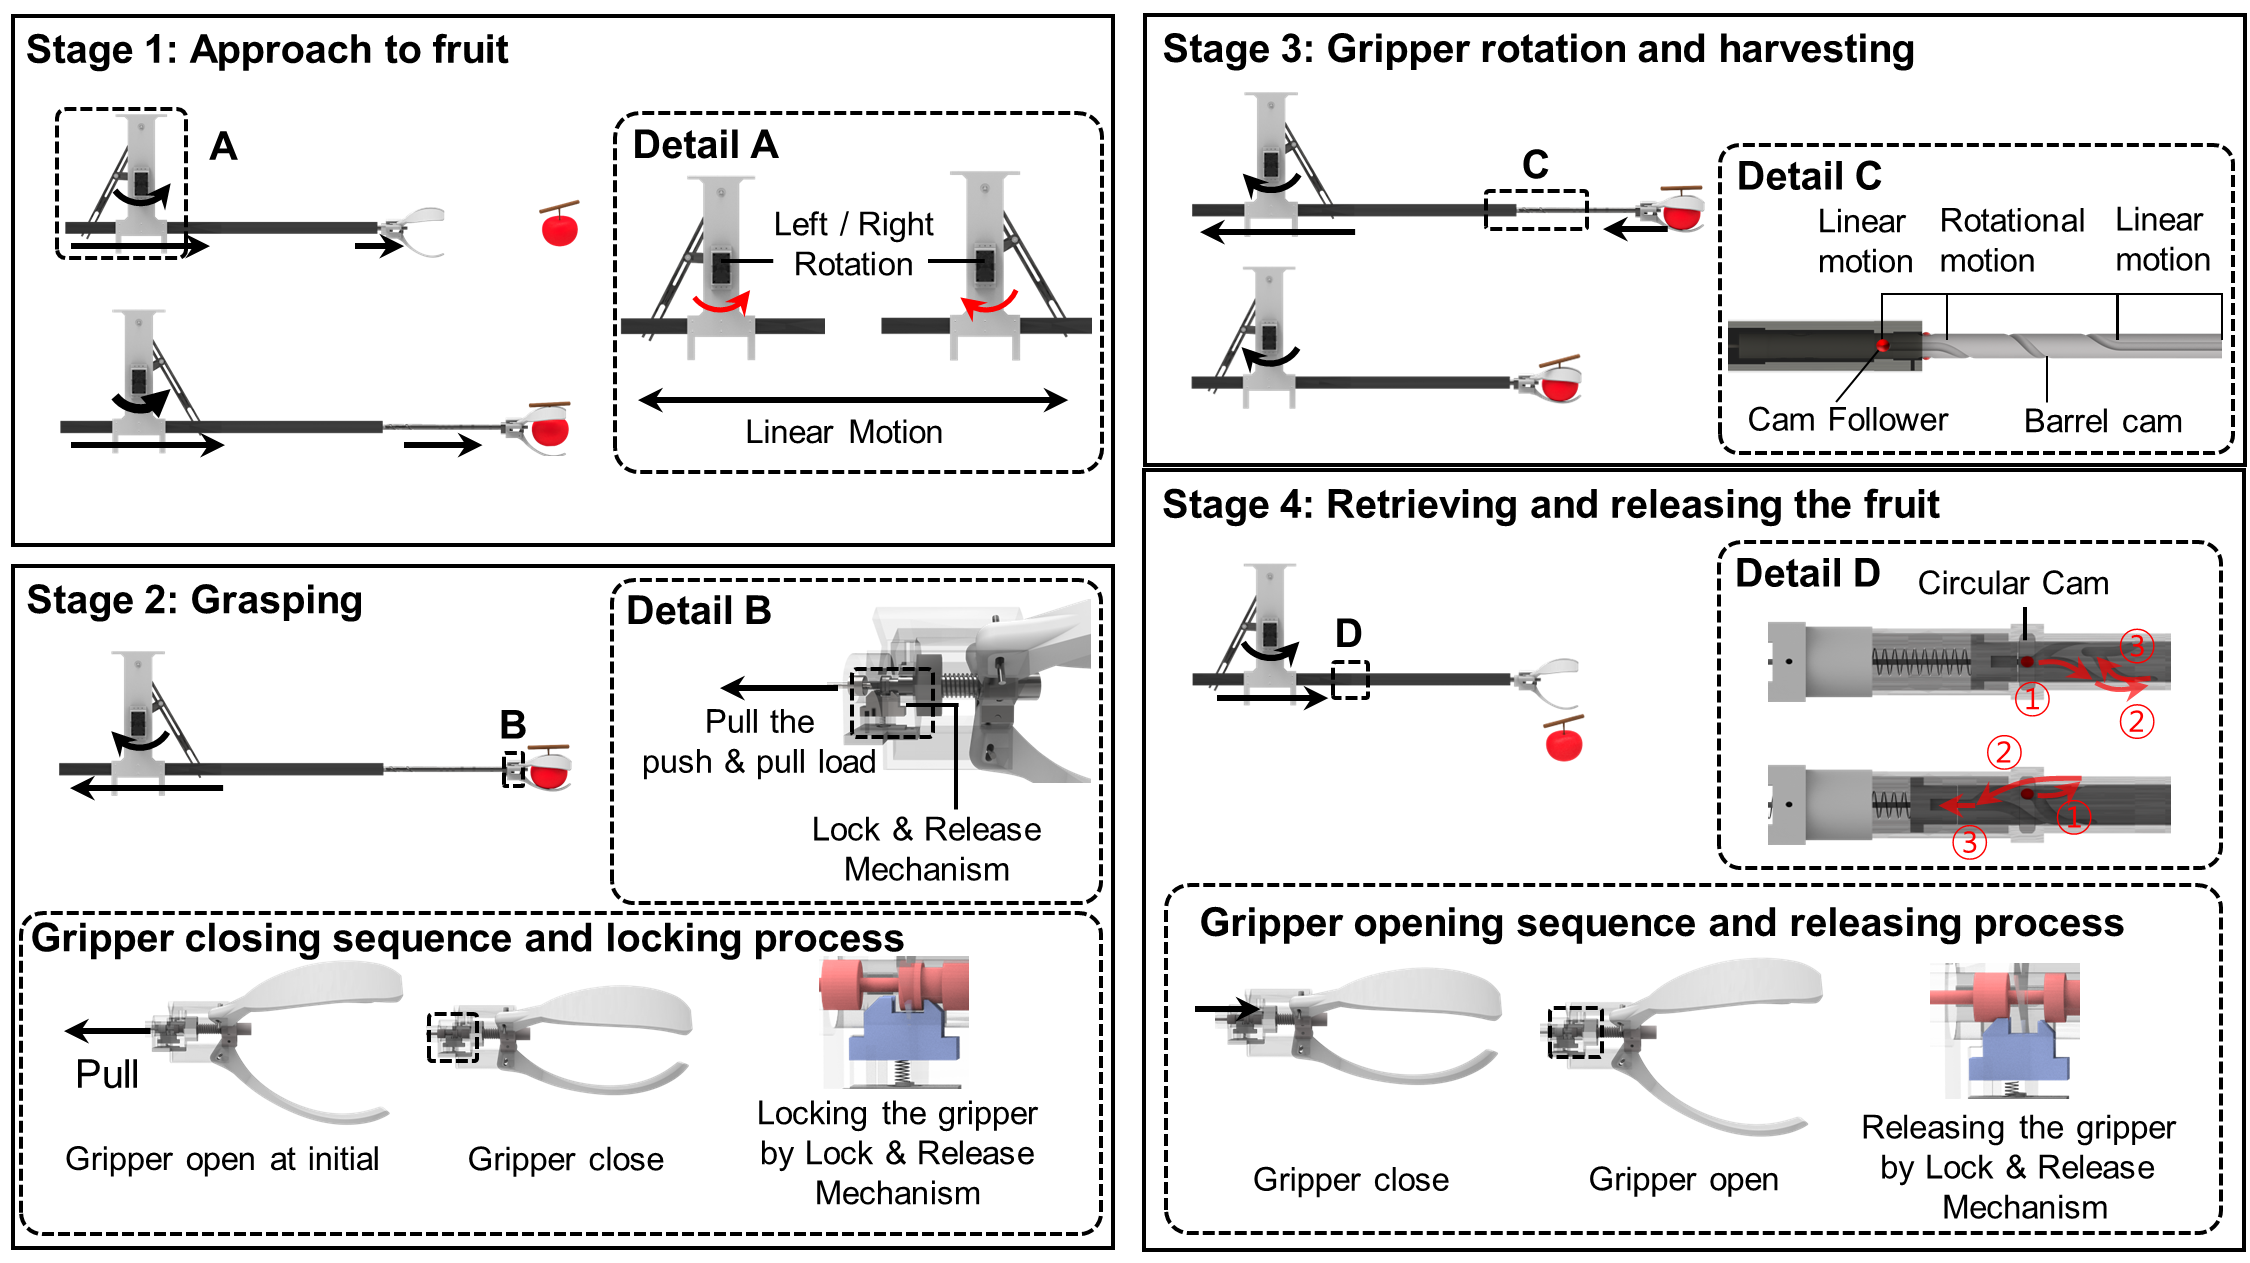

Supplement: Supplementary file 1 [file supplementary › Figure S1.tif]

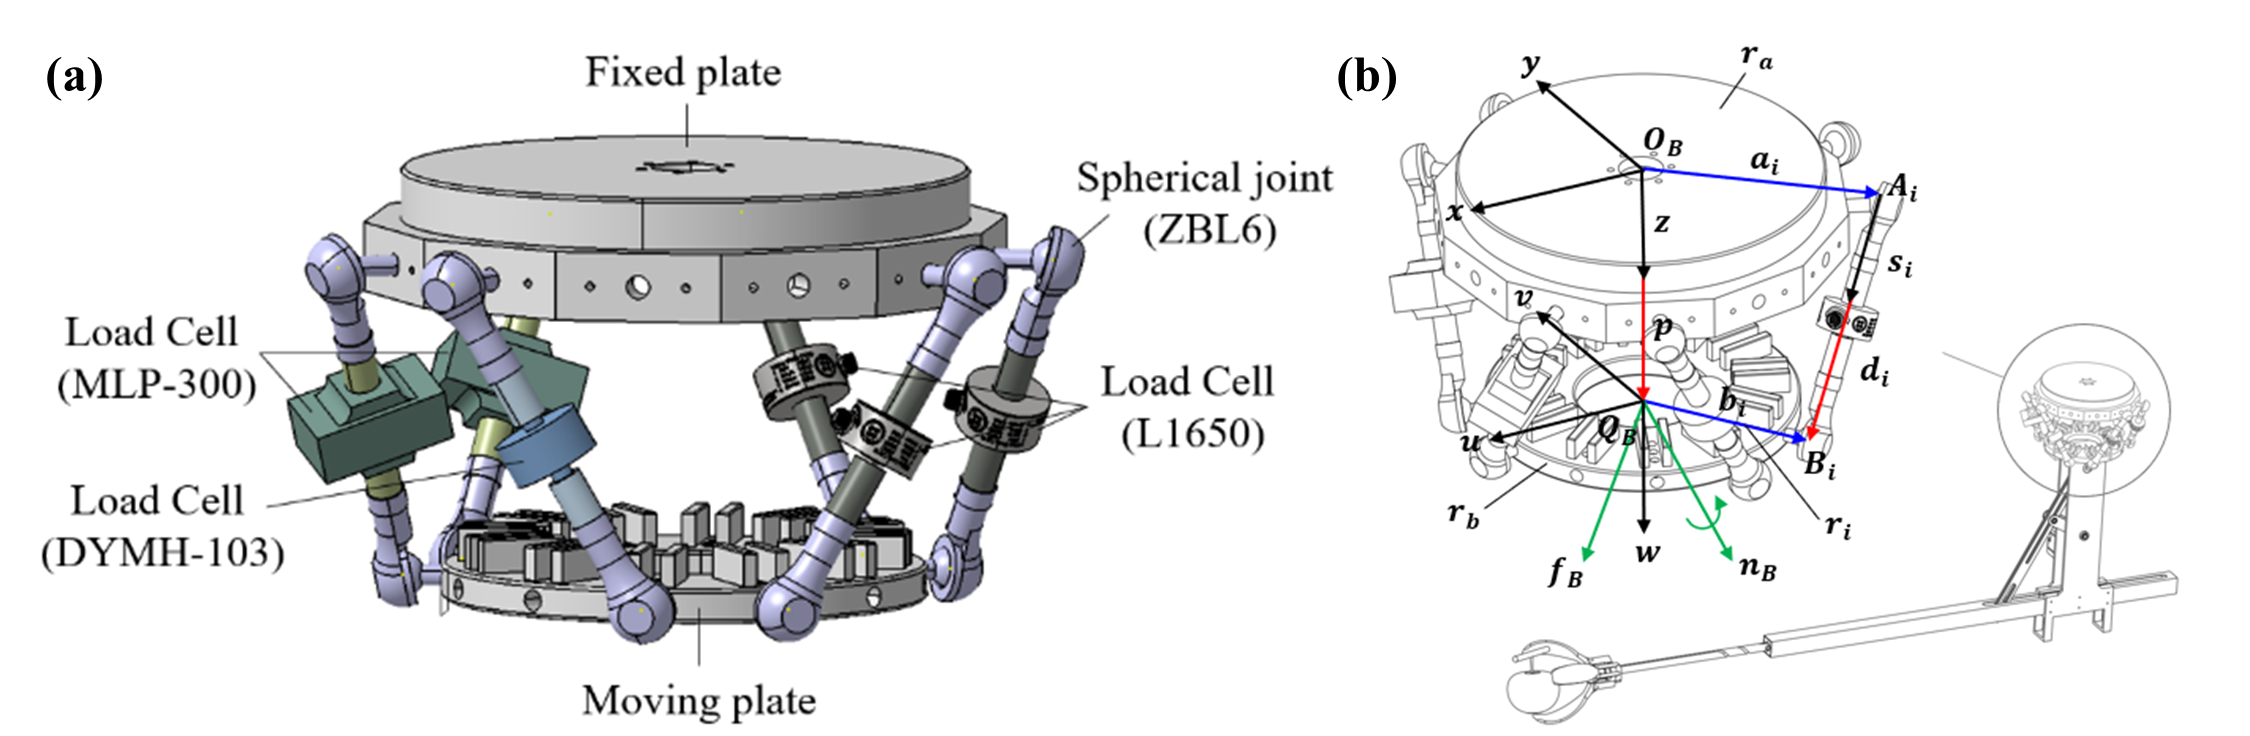

Supplement: Supplementary file 1 [file supplementary › Figure S2.tif]

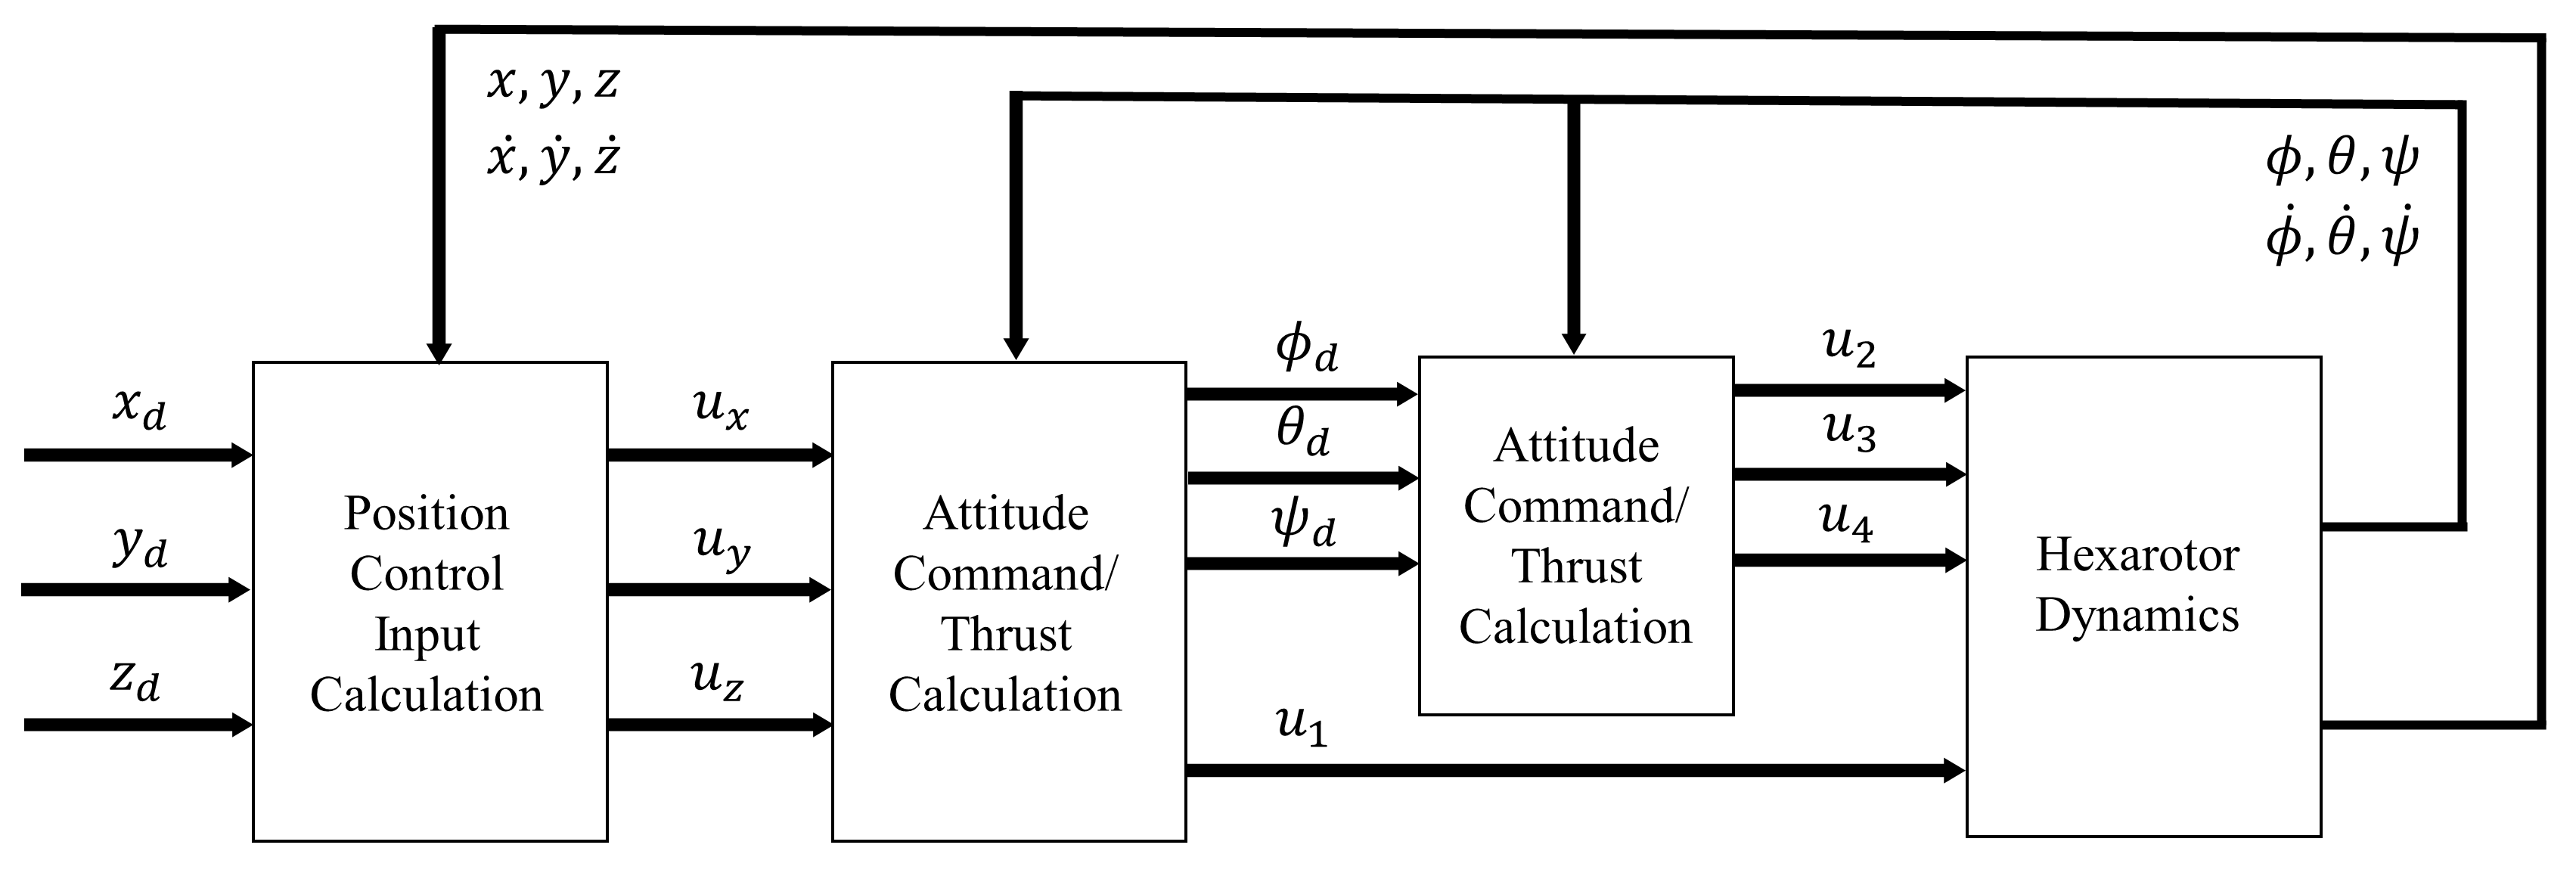

Supplement: Supplementary file 1 [file supplementary › Figure S3.tif]

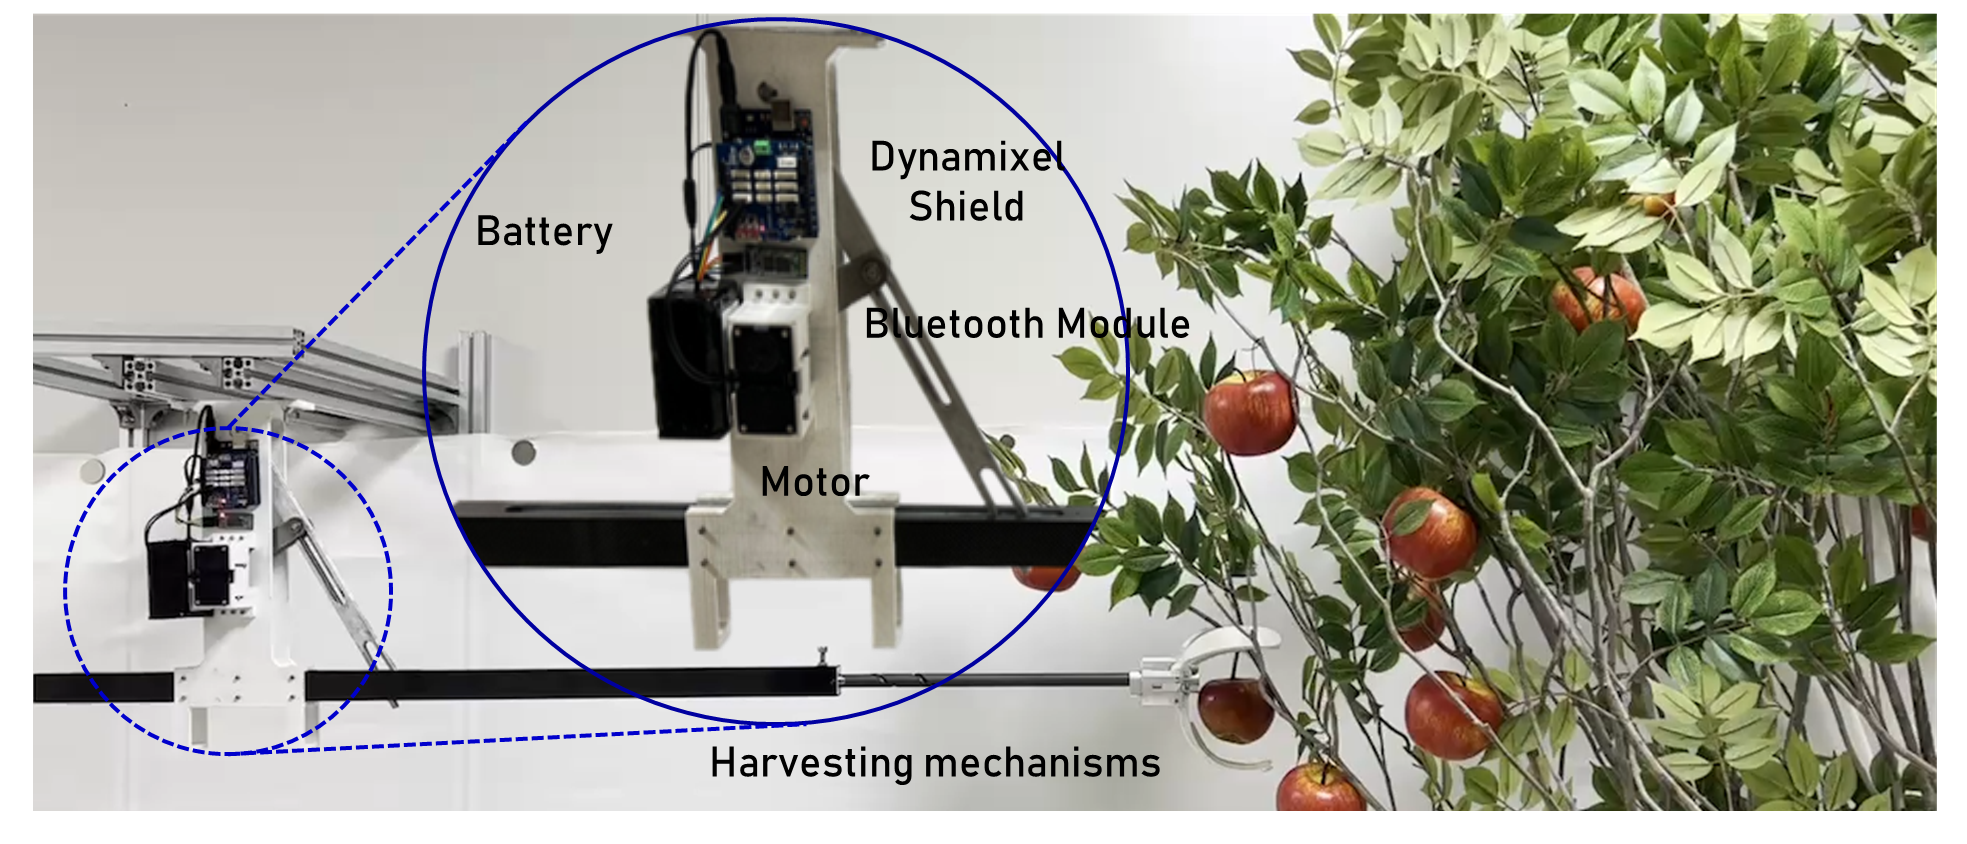

Supplement: Supplementary file 1 [file supplementary › Figure S4.tif]
